# Supplementary material
Source: PubMed Central journal article supplement (PMC9807423)

## Study flow diagram

---

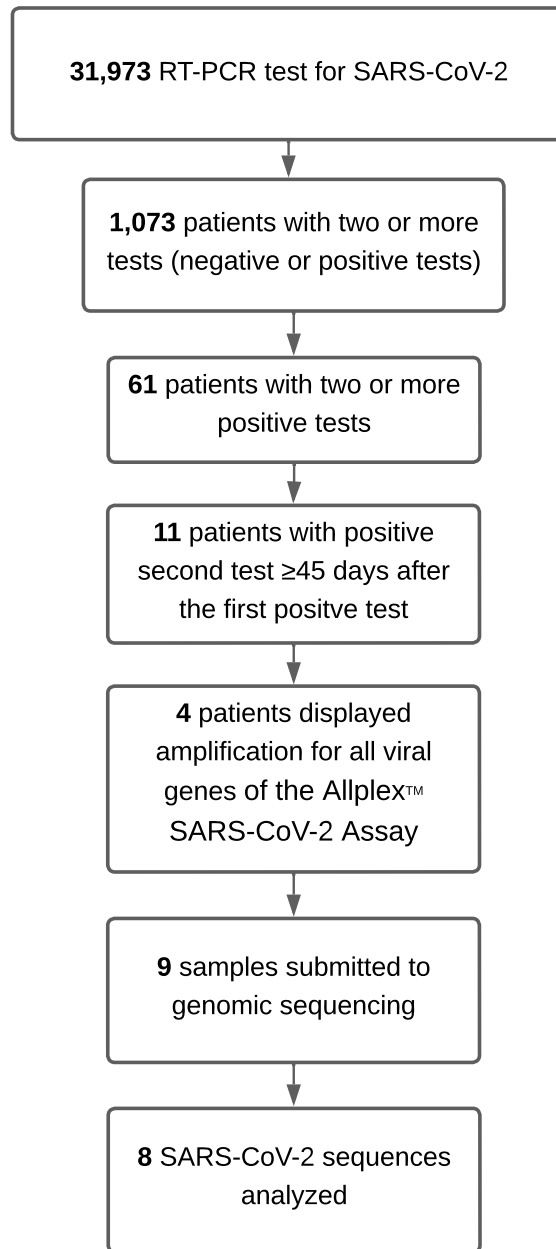

Supplement: 705_2022_5648_MOESM1_ESM.pdf [file 705_2022_5648_MOESM1_ESM.pdf]
